# Supplementary material
Source: MDPI journal article supplement (https://www.mdpi.com/1996-1073/13/13/3435)
Supplement: s1 [file s1]

# Appendix A. The simulation model of hybrid power supply system developed in the Matlab-Simulink environment.

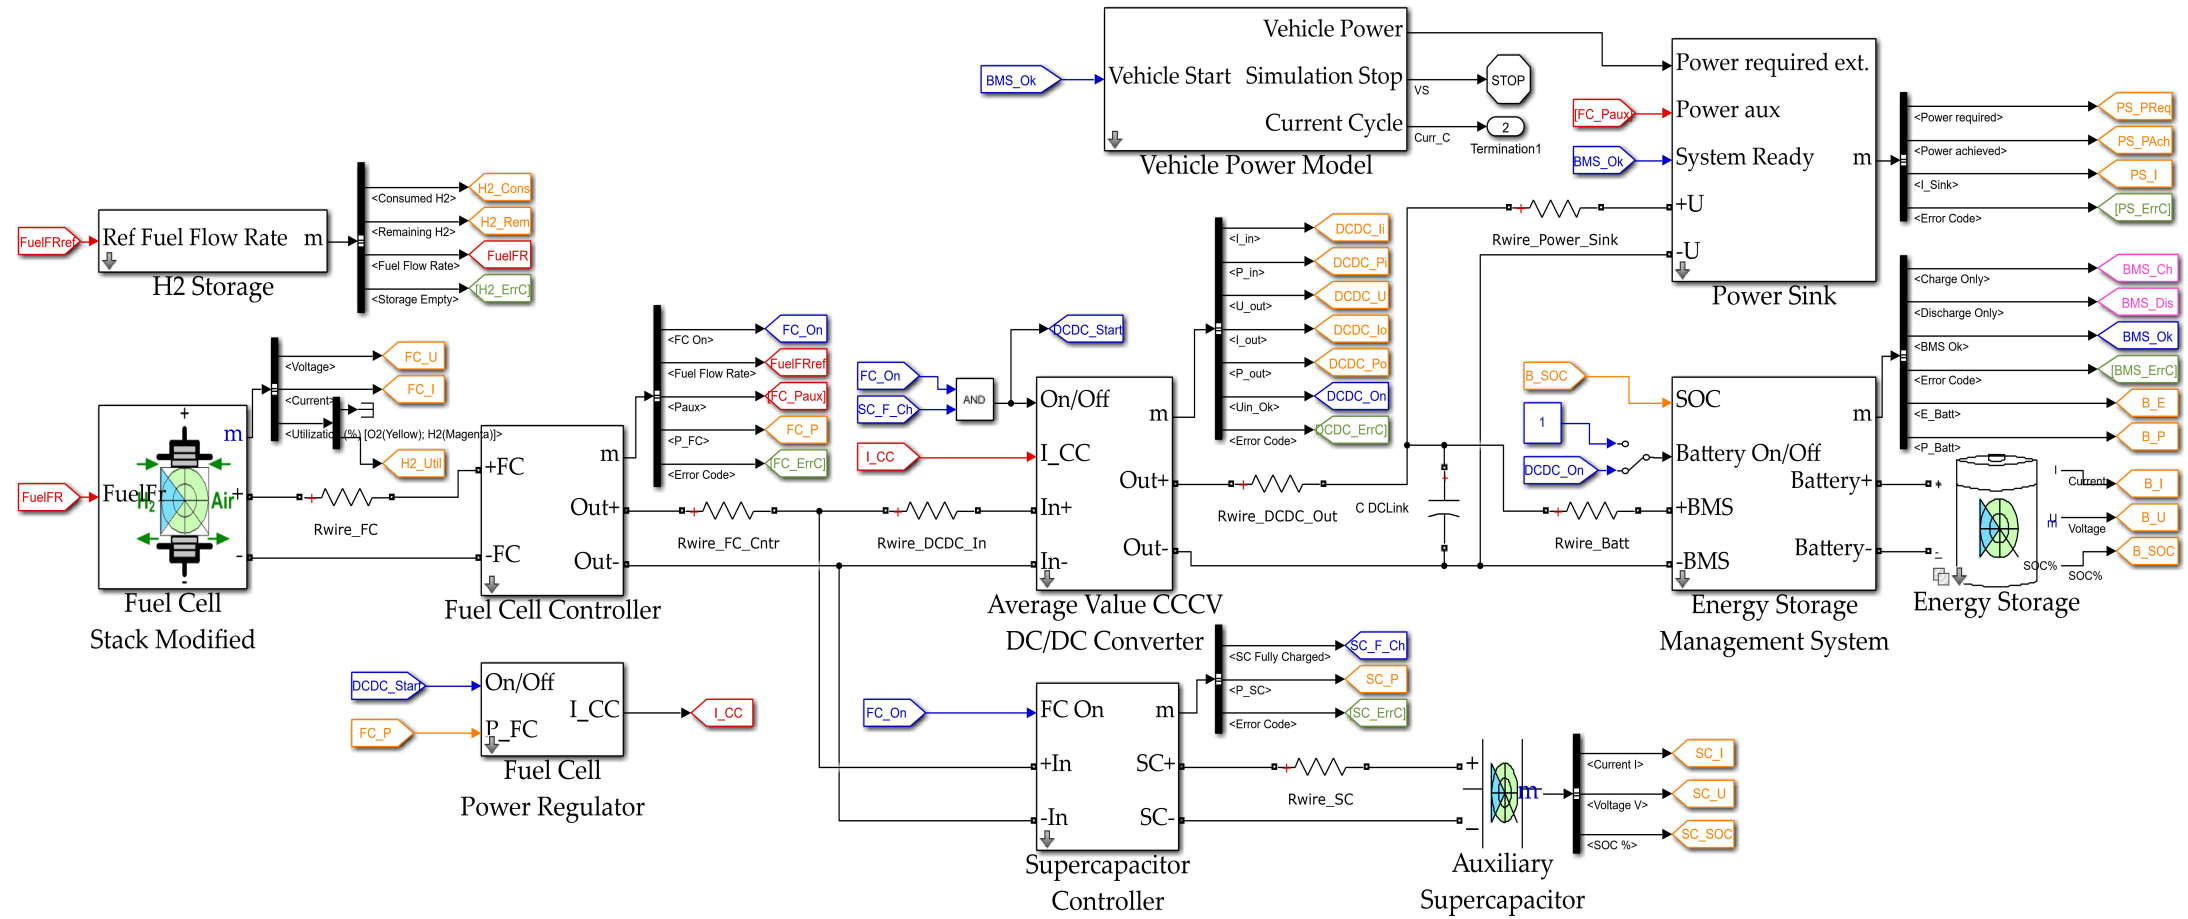

Figure A.1. The simulation model of hybrid power supply system developed in the Matlab-Simulink environment.

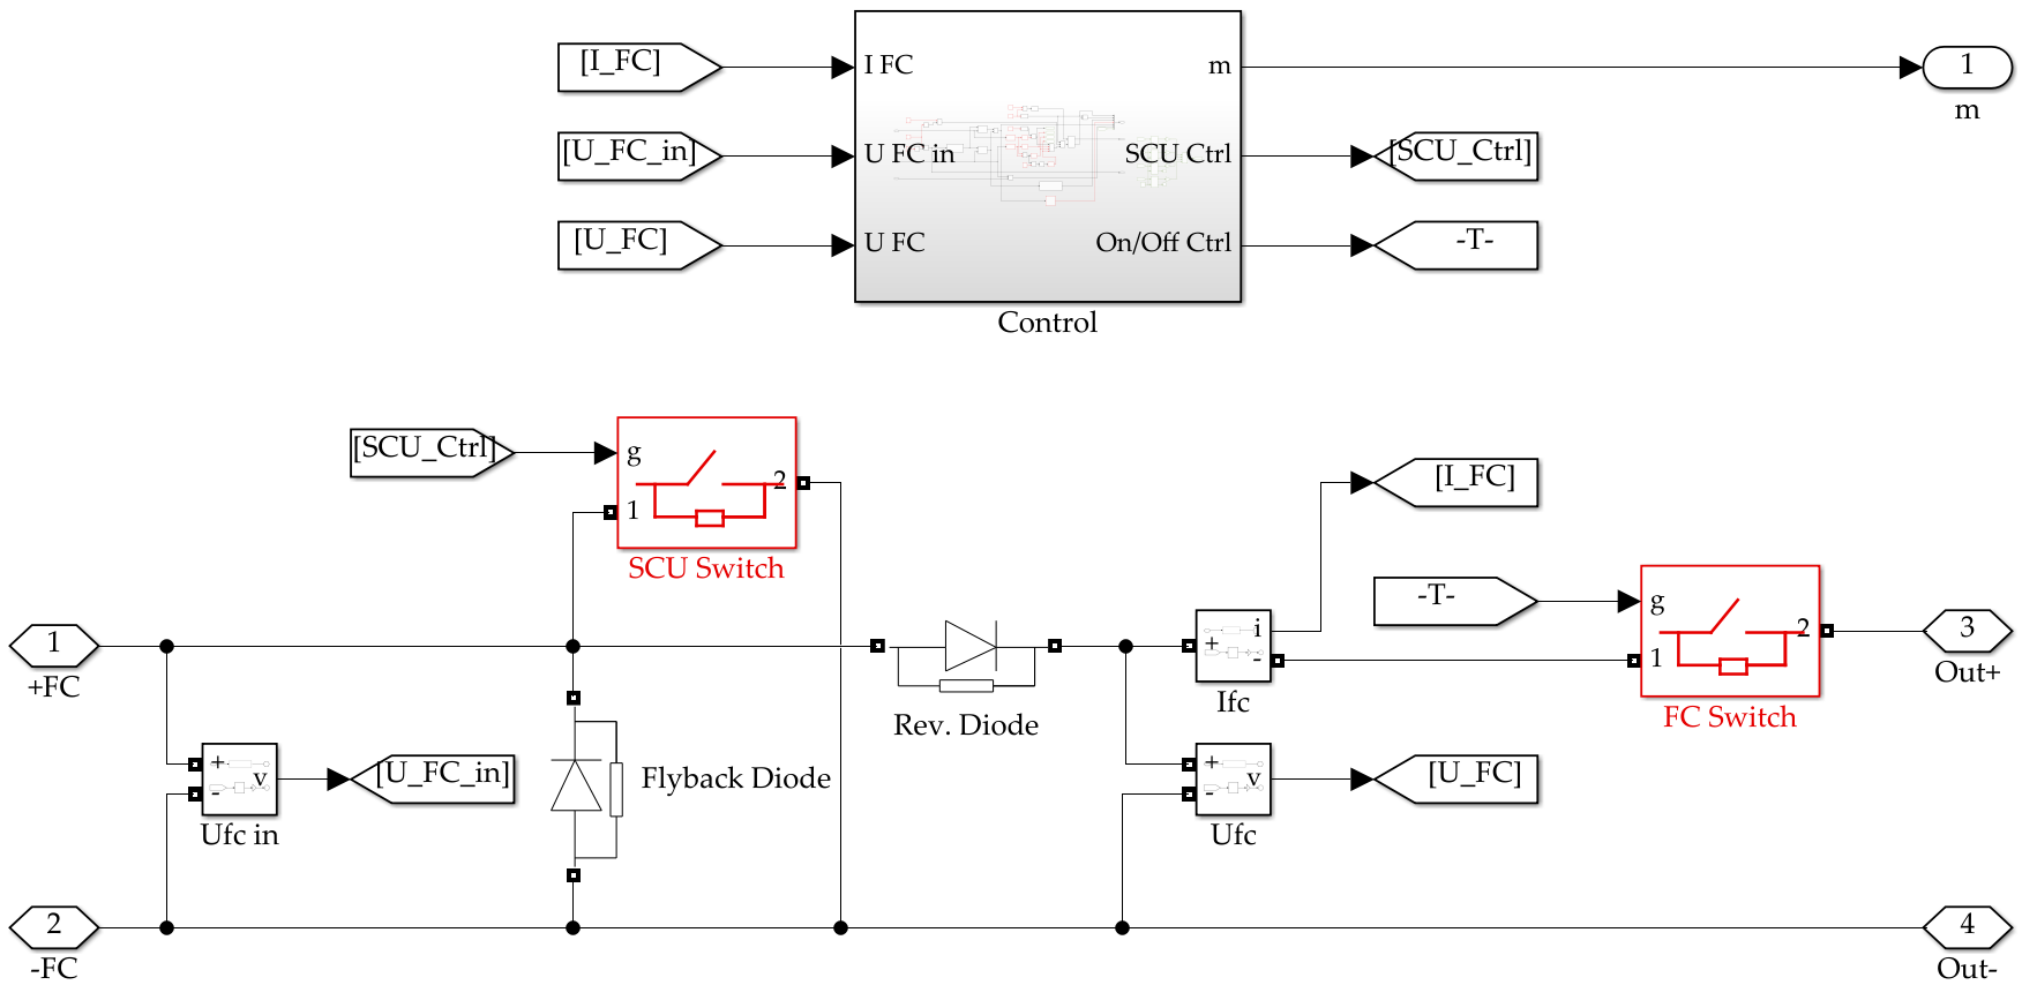

Figure A.2. The "Fuel Cell Controller" subsystem.

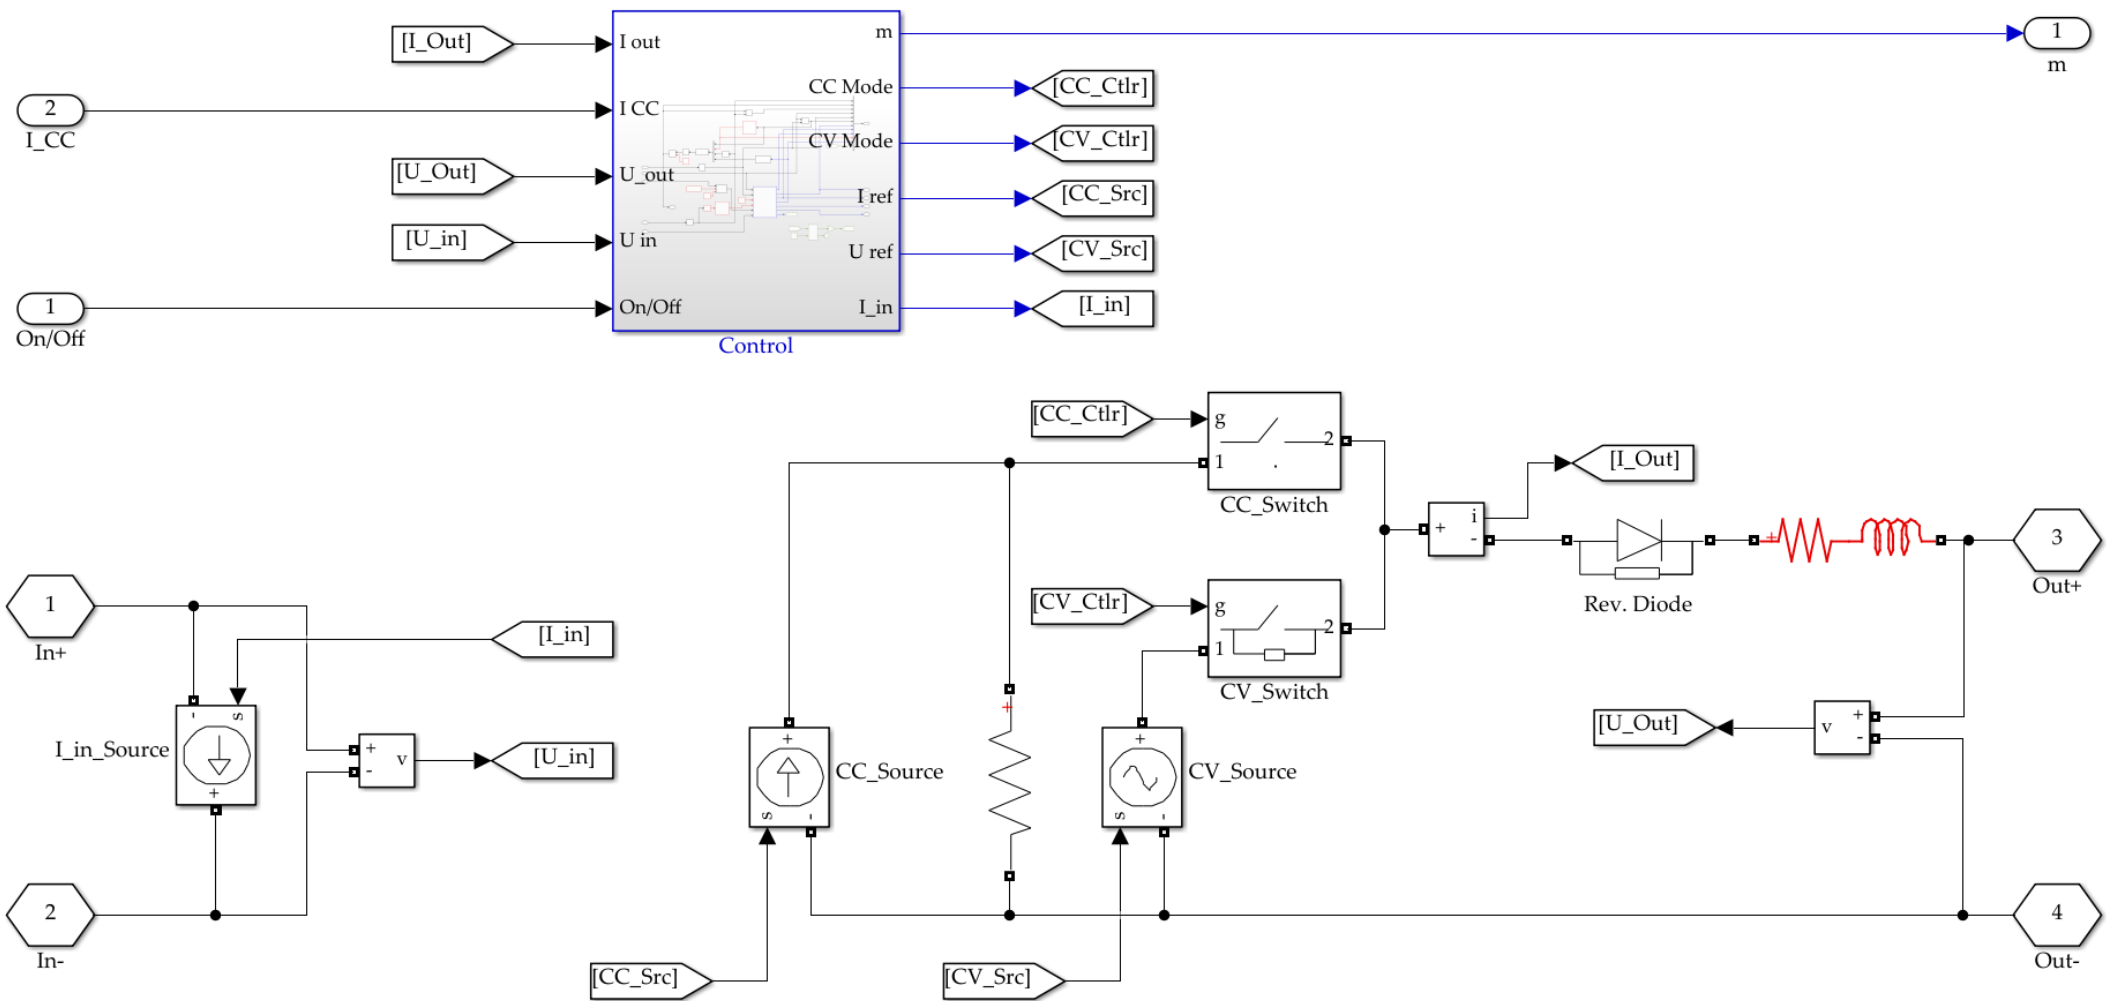

Figure A.3. The "Average Value CCCV DC/DC Converter" subsystem.

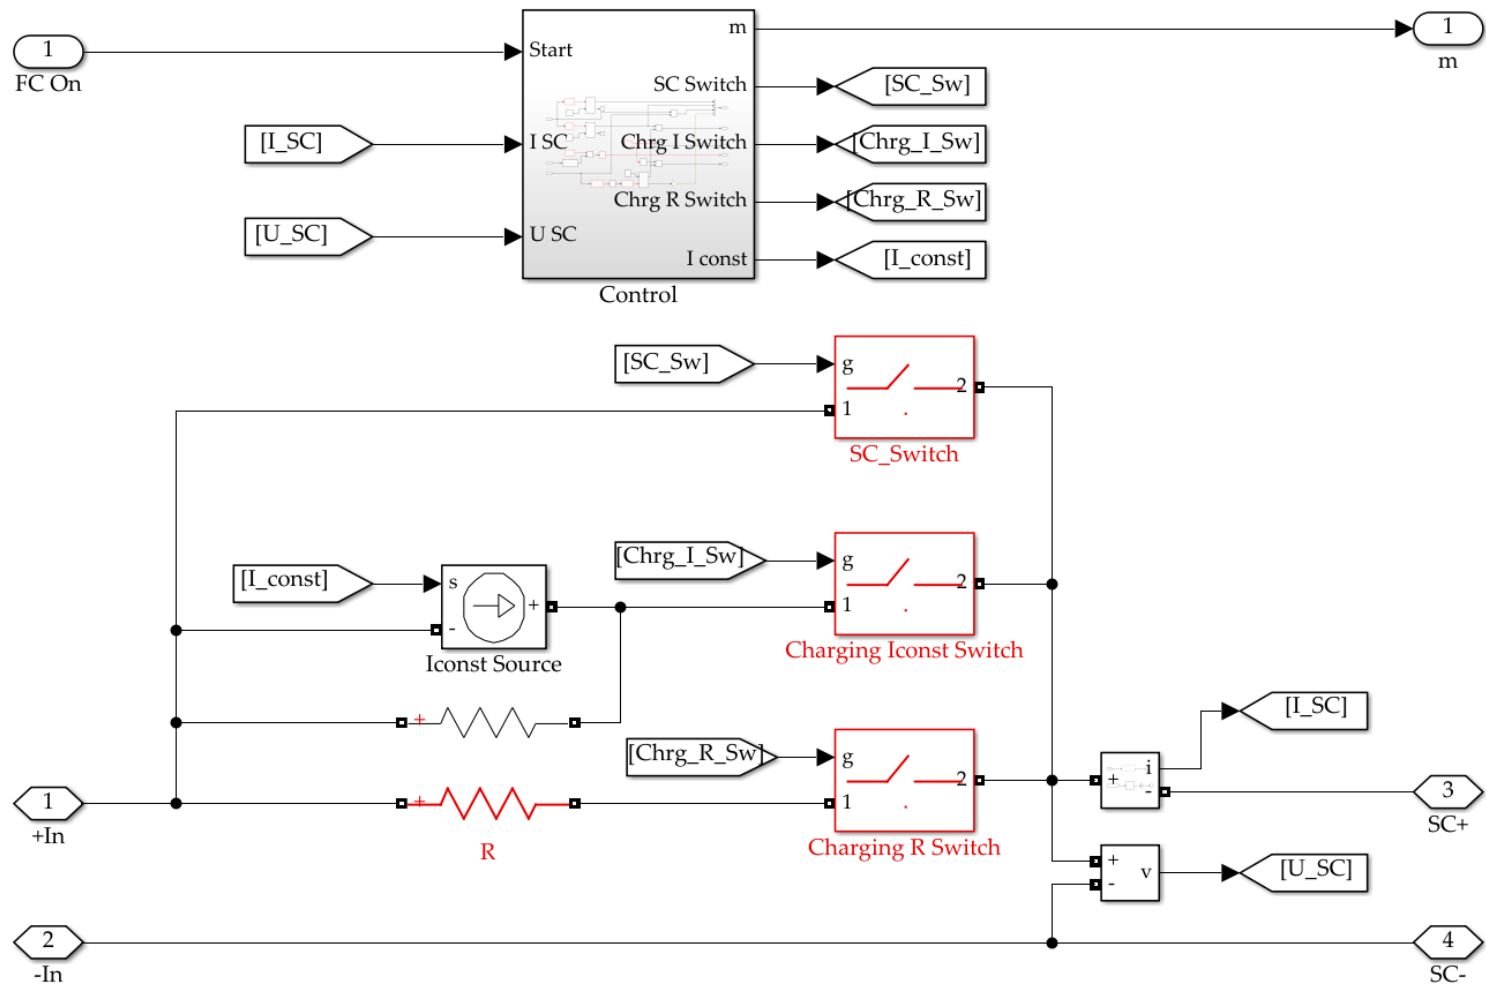

Figure A.4. The "Supercapacitor Controller" subsystem

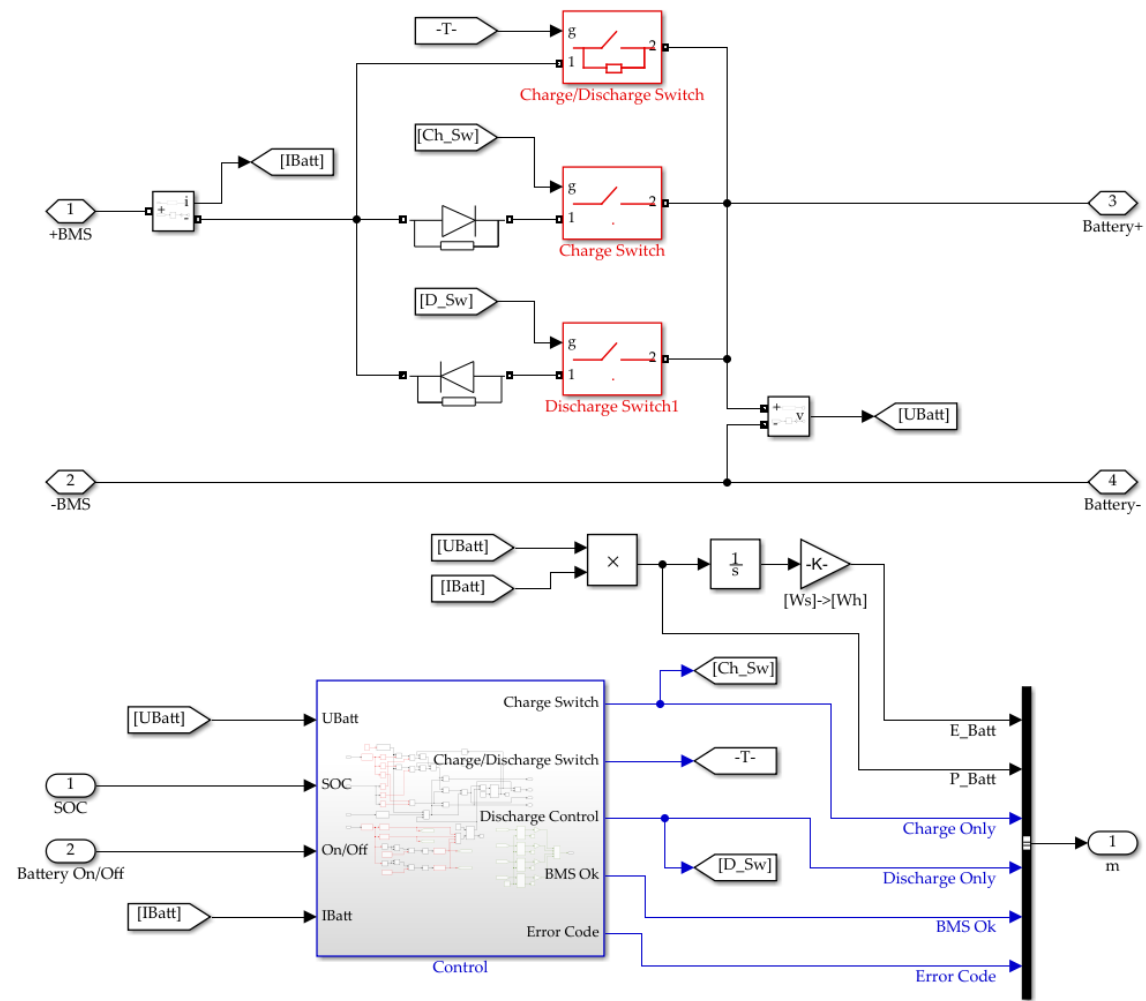

Figure A.5. The “Energy Storage Management System” subsystem.

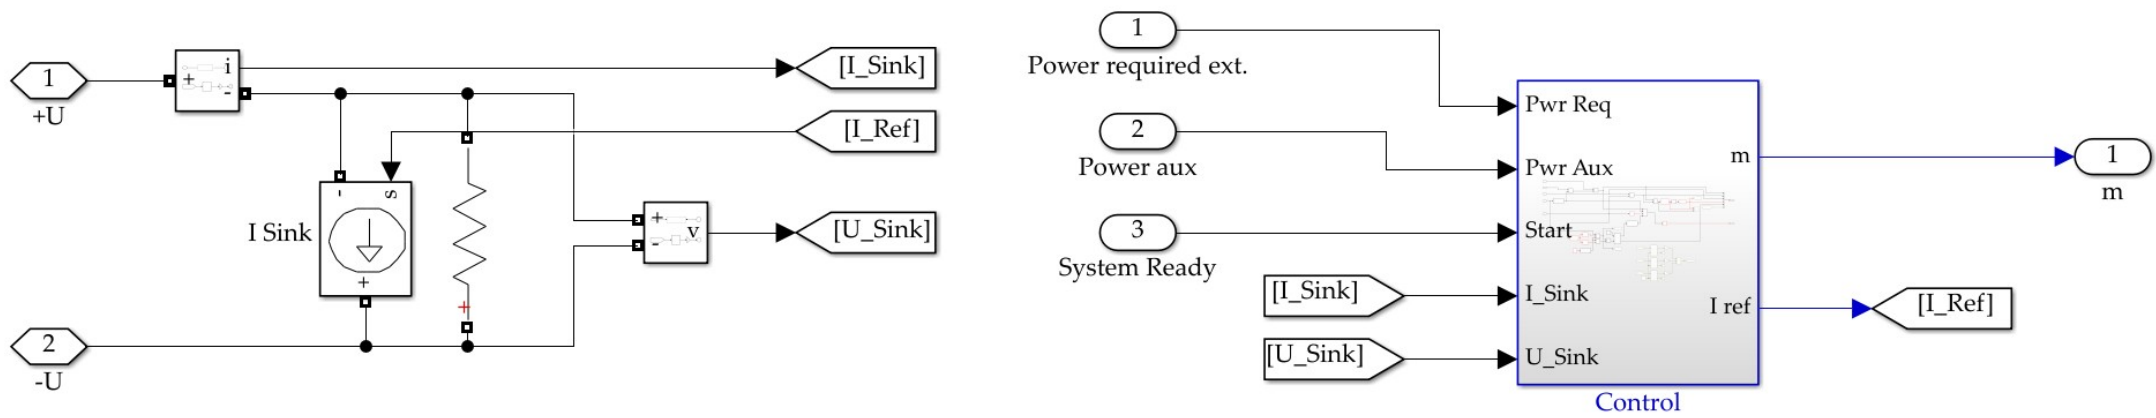

Figure A.6. The "Power Sink" subsystem.

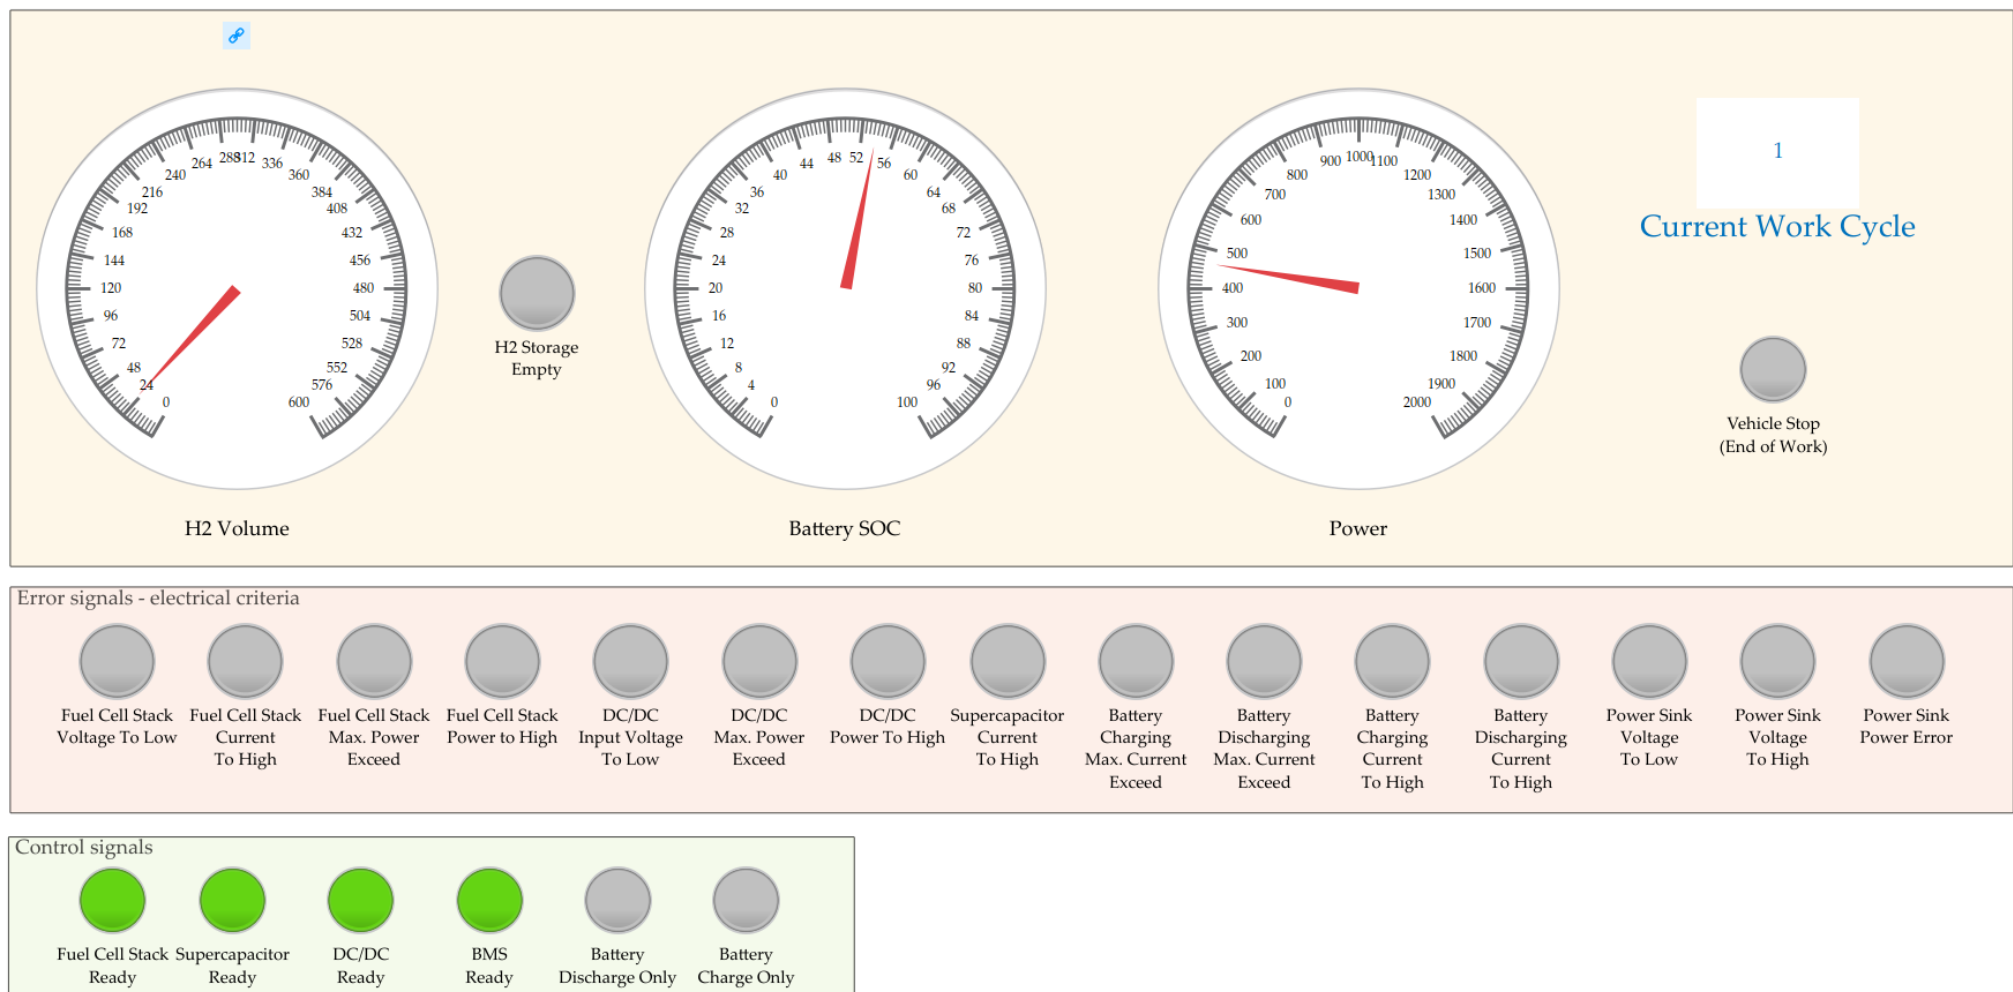

Figure A.7. The dashboard for simulation model.
